# Supplementary material for: Forchlorfenuron-Induced Mitochondrial Respiration Inhibition and Metabolic Shifts in Endometrial Cancer
Source: MDPI journal article supplement (doi:10.3390/cancers16050976), 2024-02-28

Figure 2G

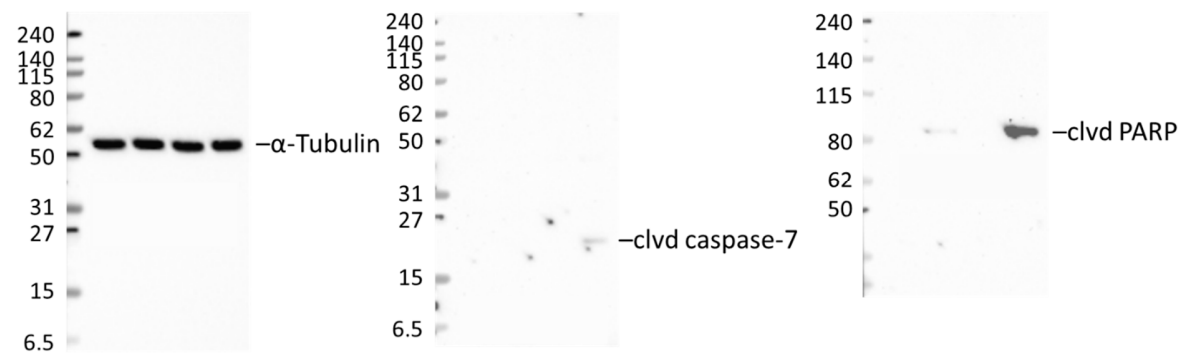

Figure 3A

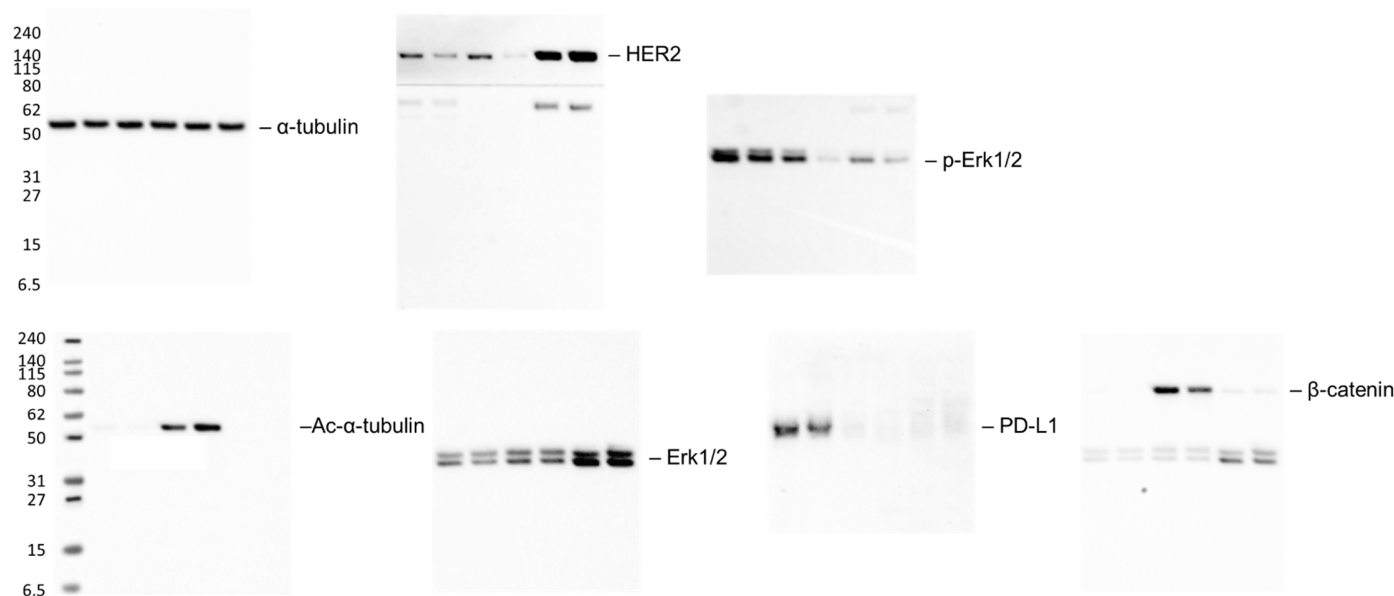

Figure 3B

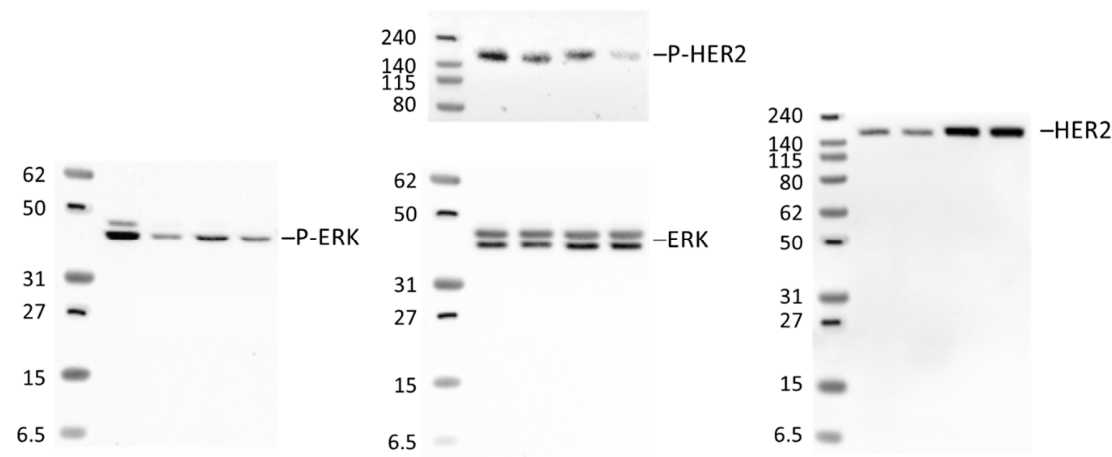

Figure 3D

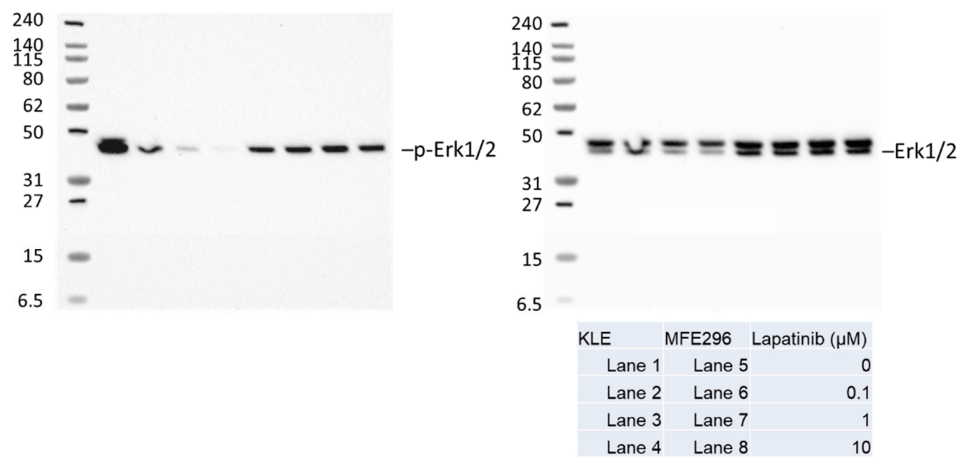

Figure 3E

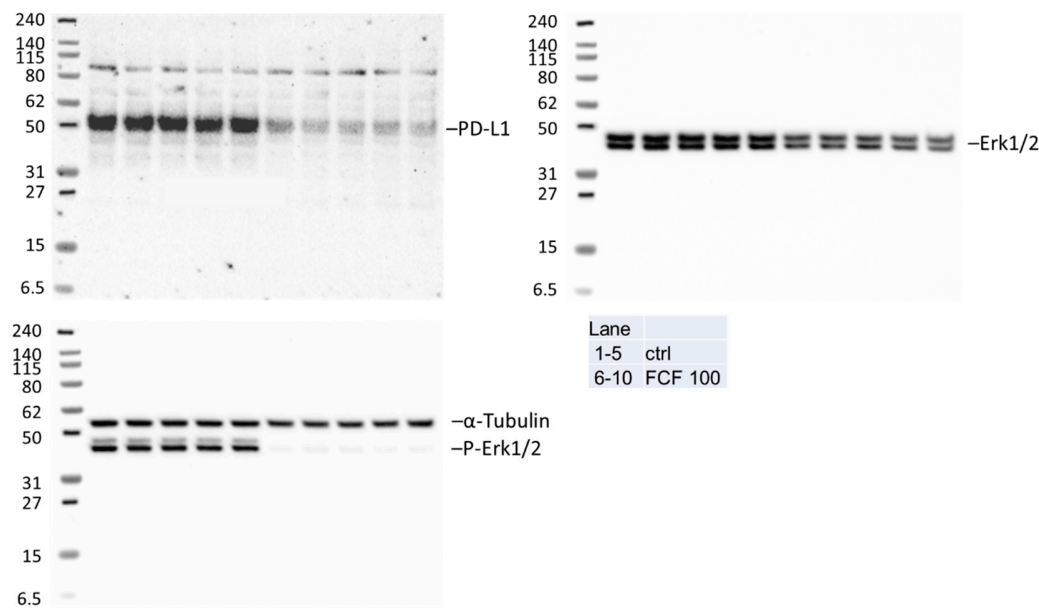

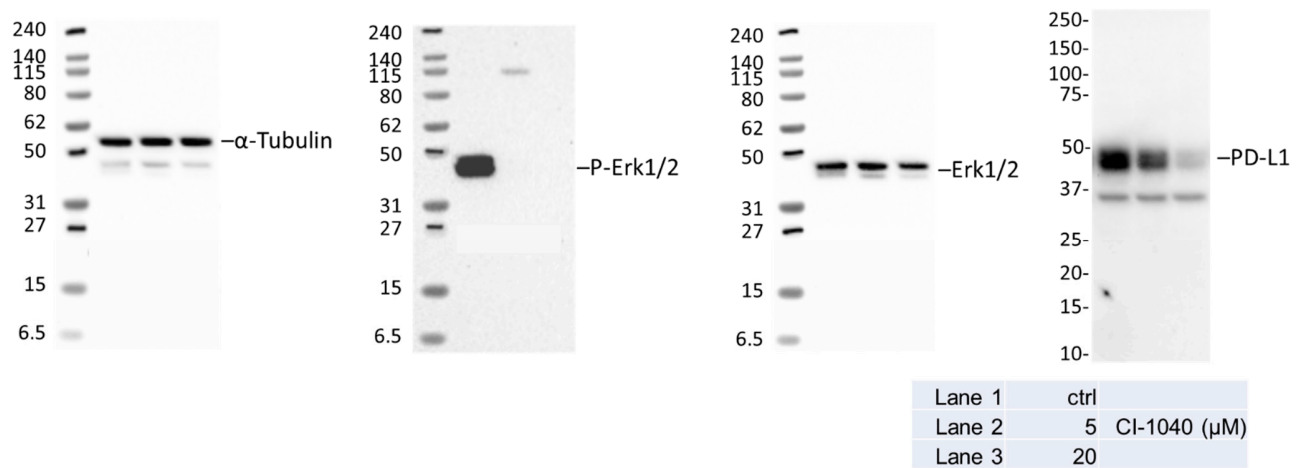

Figure 4F

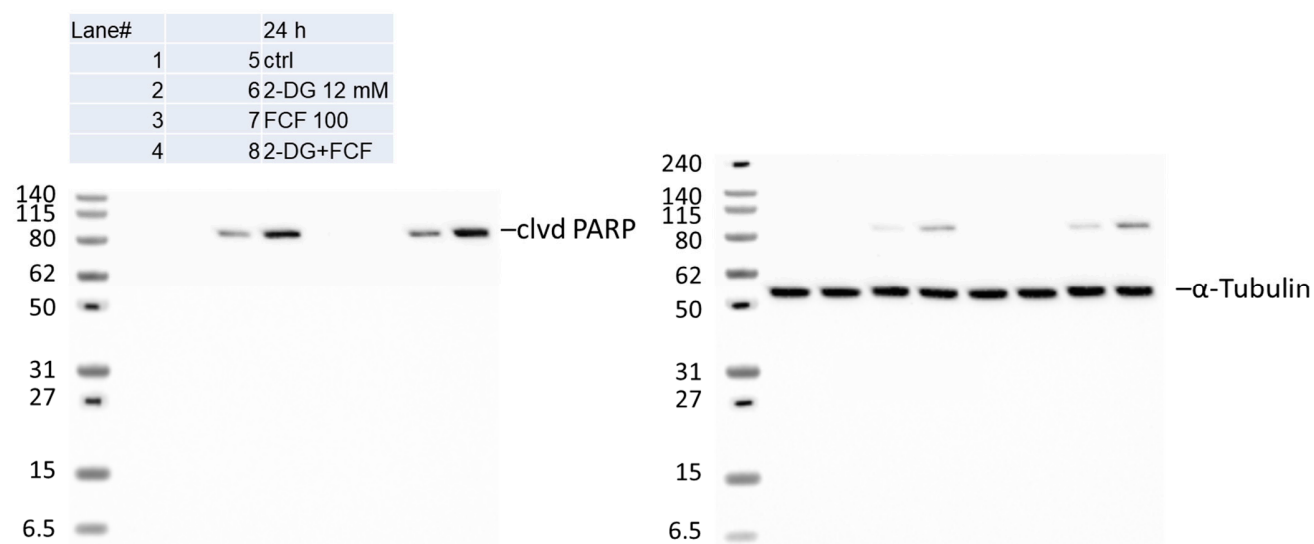

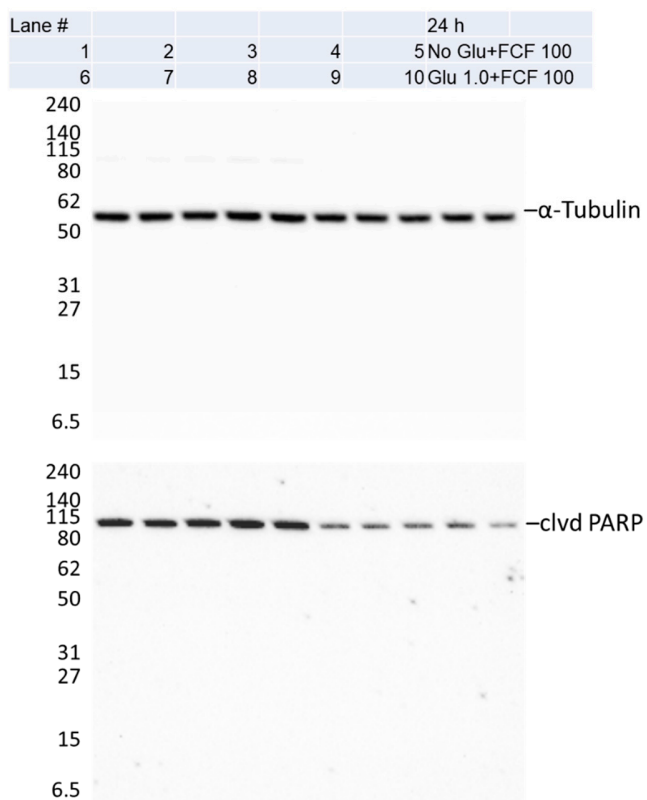

Figure 5A

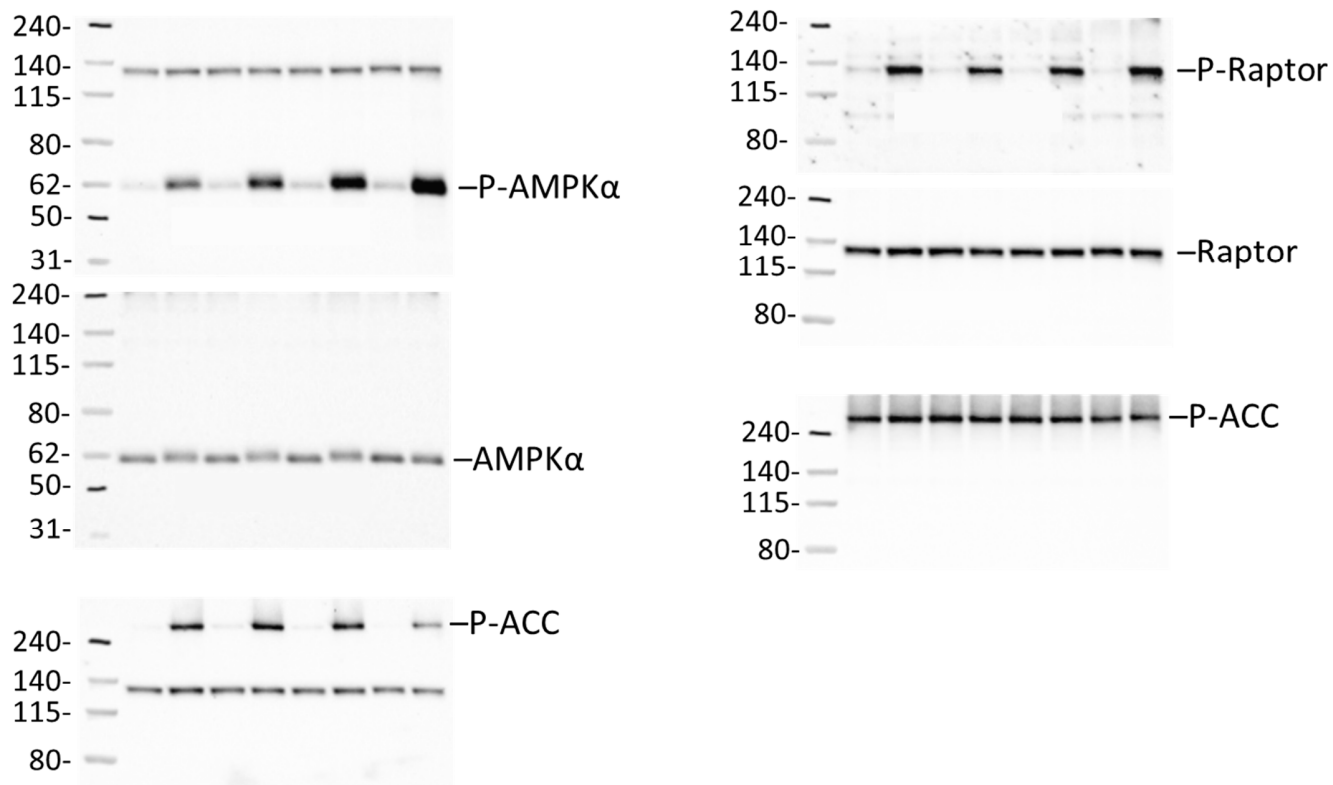

Figure 5B

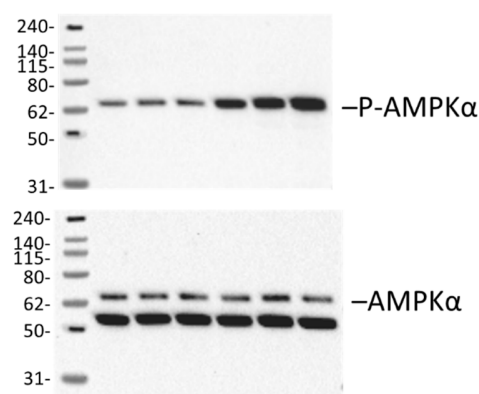

Figure 5C

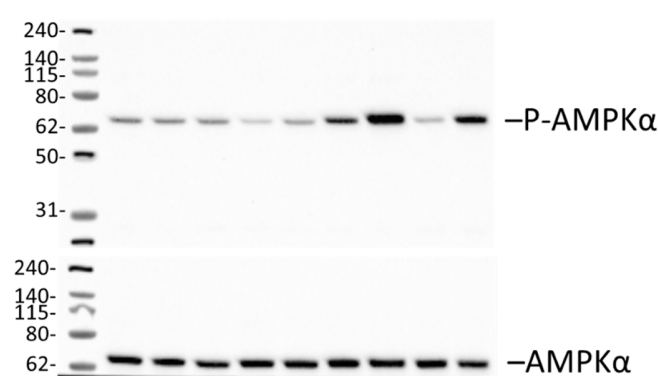

Figure 5F

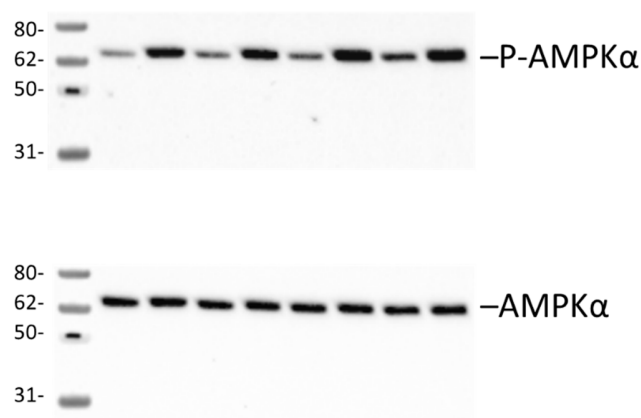

Figure 6A

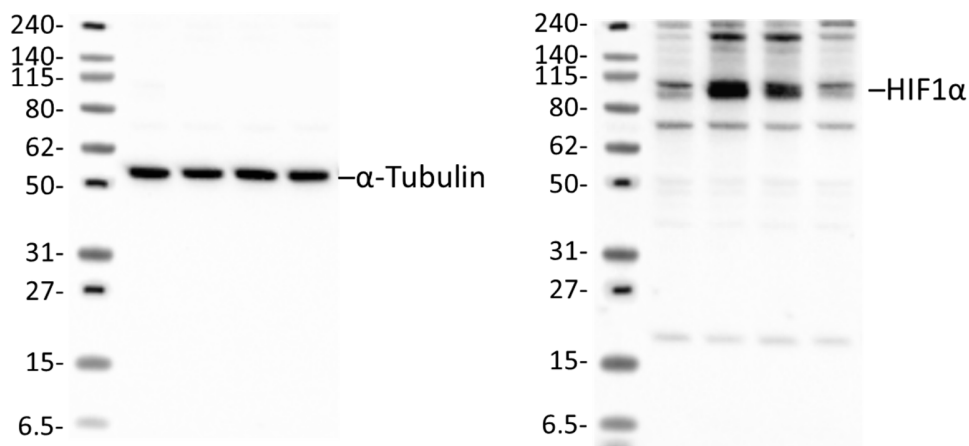

Figure 6C

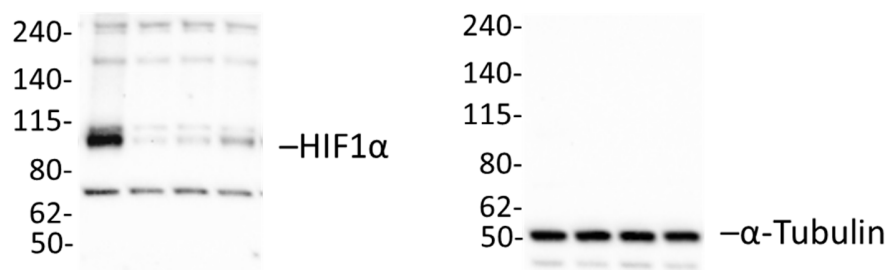

Figure 6F

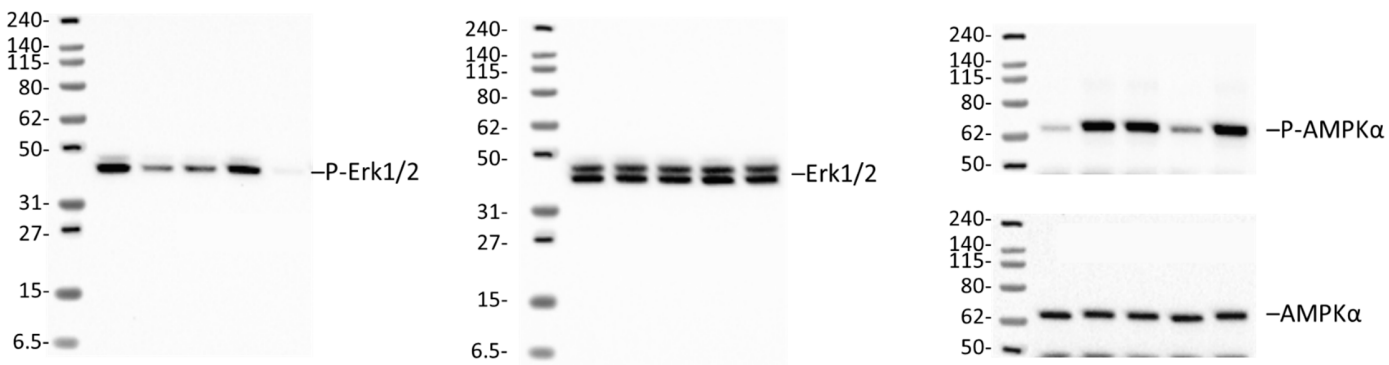

Figure 6G

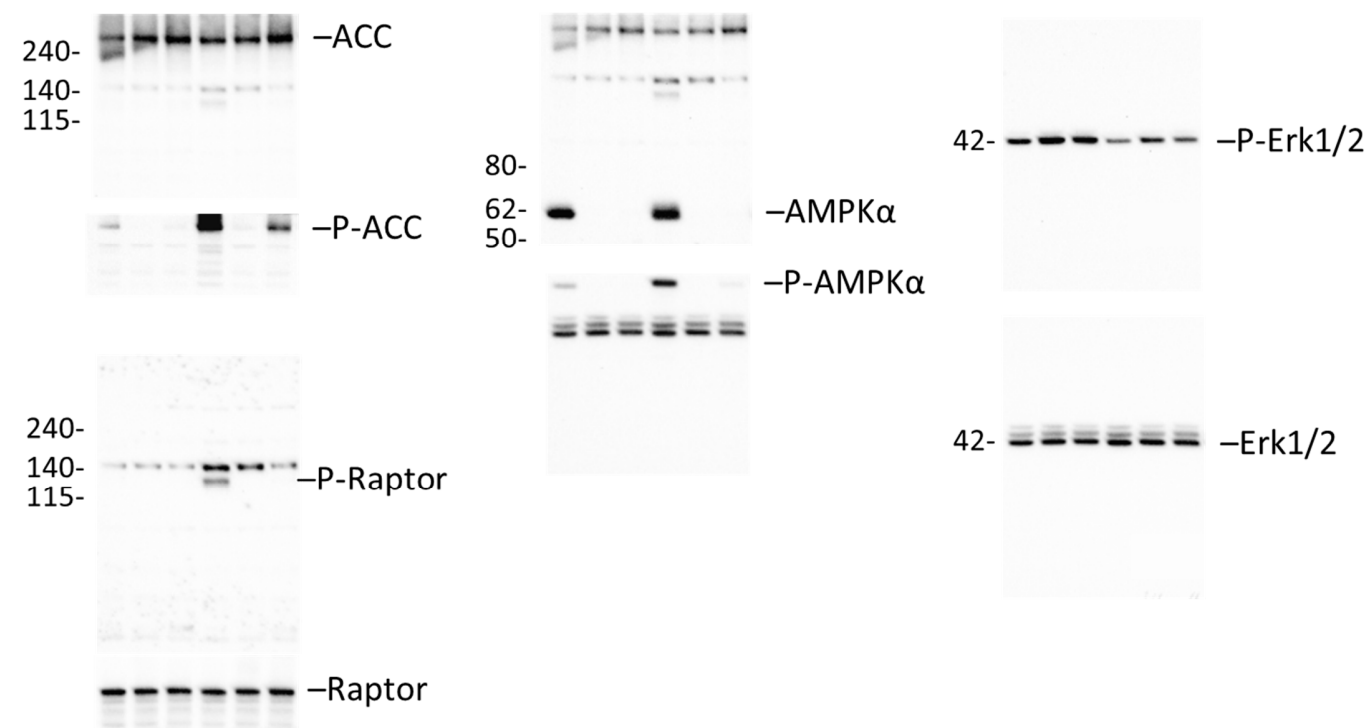

Figure 6H

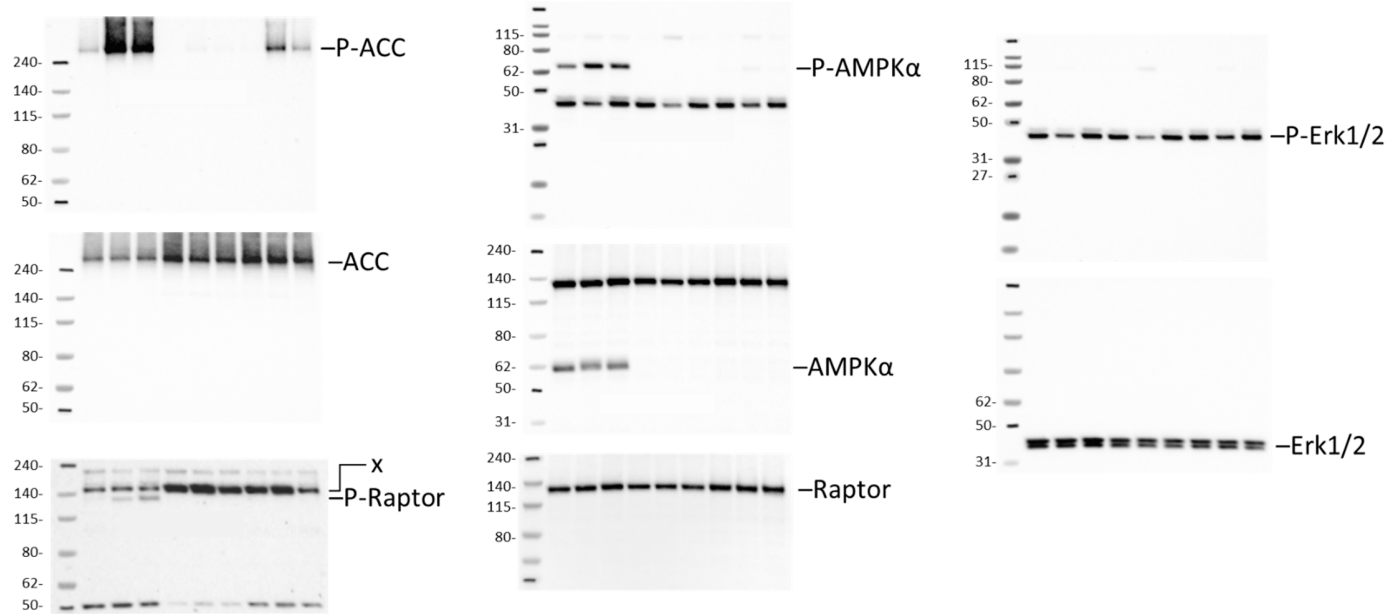

Figure 7A

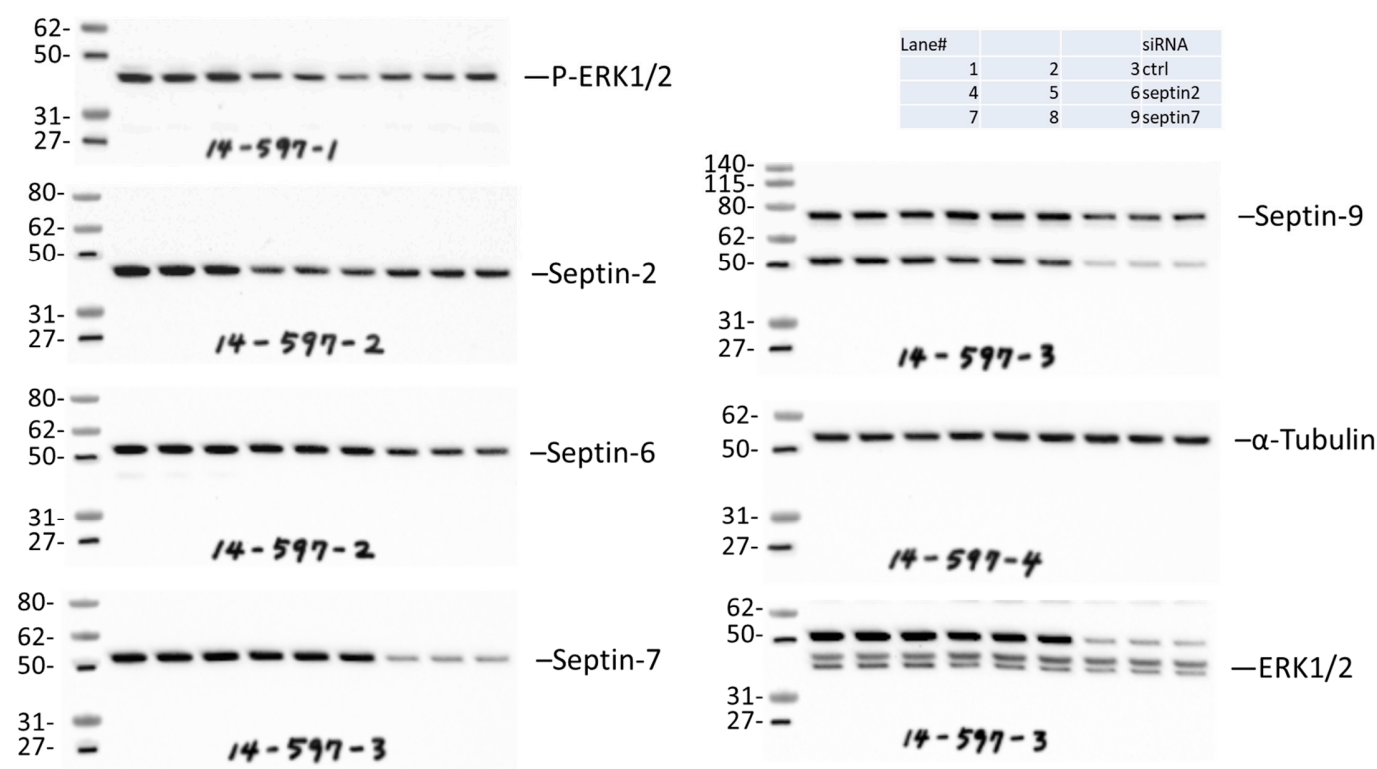

Figure 7B

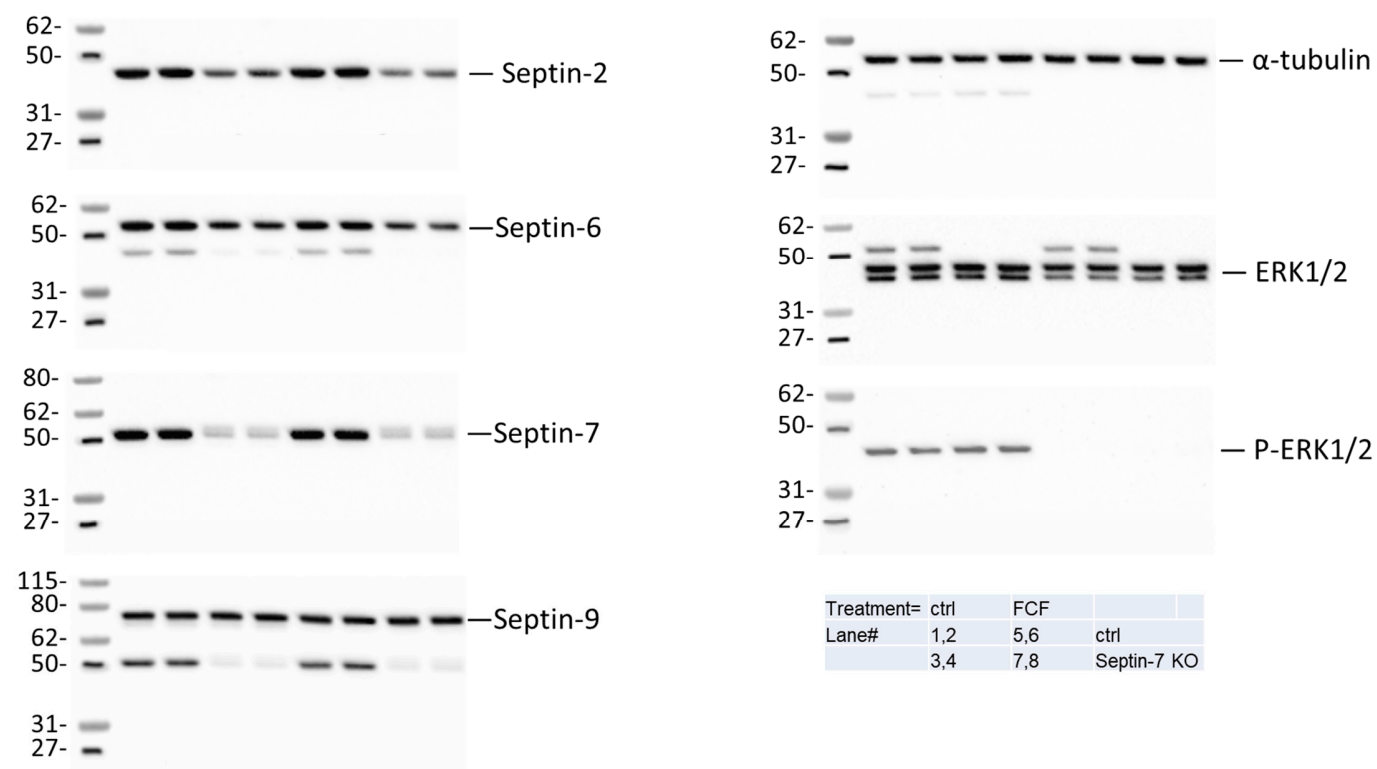



Figure 7C

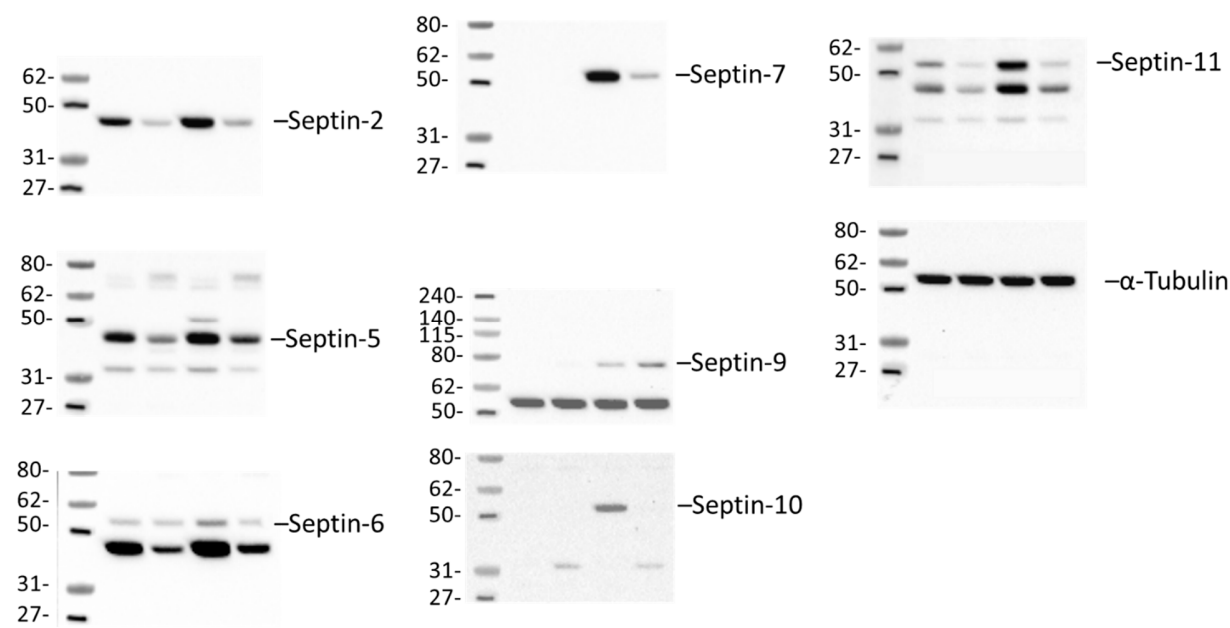

Supplement: s1 [file s1]
